# Supplementary material
Source: Springer Nature journal article supplement (https://www.springermedizin.de/resource/supplementary/13054_2010_8530_MOESM2_ESM.pdf/9732174)

Cumulative incidence  
of type 2 diabet (%)

40  
20  
0

Logrank  $P < 0.001$

Hyperglycaemia group

Normoglycaemia group

0

2

4

6

8

10

12

Years of follow-up

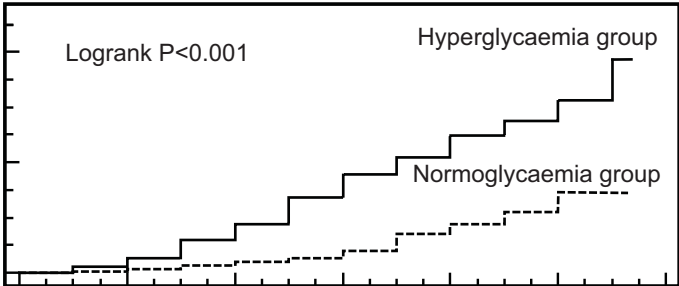

Supplement: MOESM2 [file 9732174]
